# Supplementary material
Source: ML conference proceedings conference paper supplement (https://openreview.net/forum?id=GP30inajOt)

layer.2.value\_proj

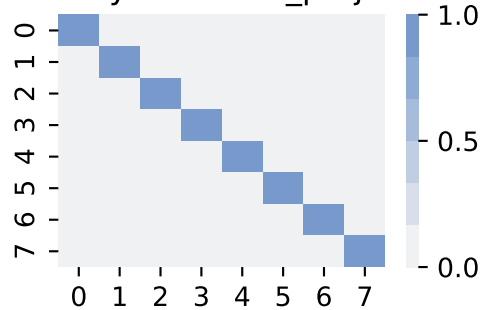

layer.2.attention.output

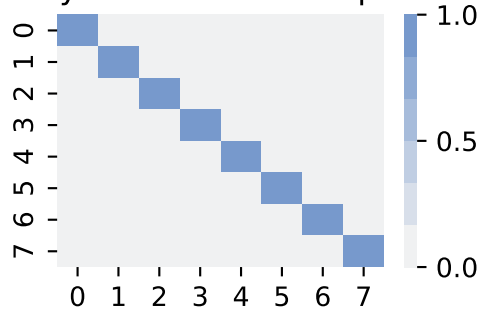

layer.2.intermediate.dense

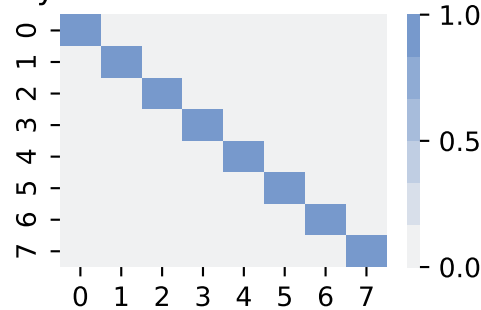

layer.2.output.dense

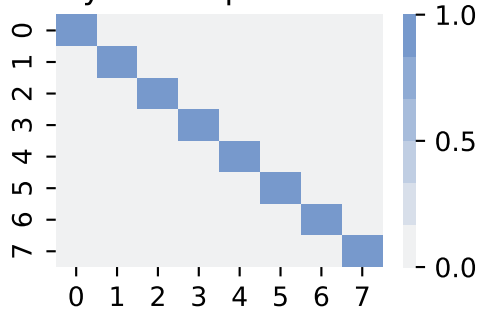

layer.3.query\_proj

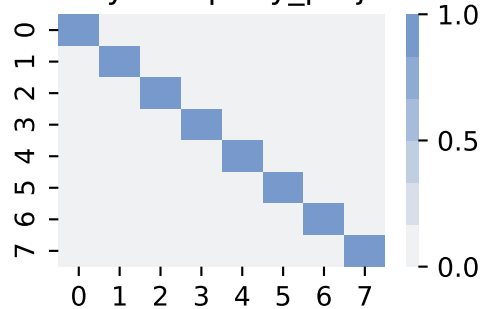

layer.3.key\_proj

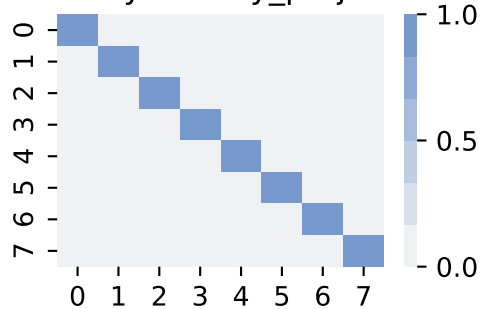

layer.3.value\_proj

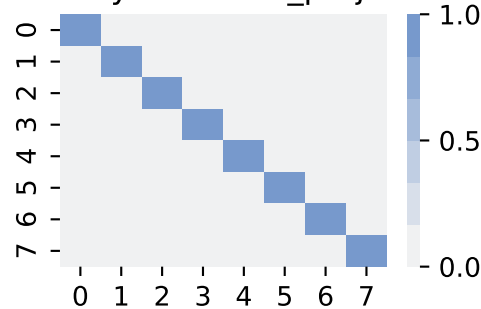

layer.3.attention.output

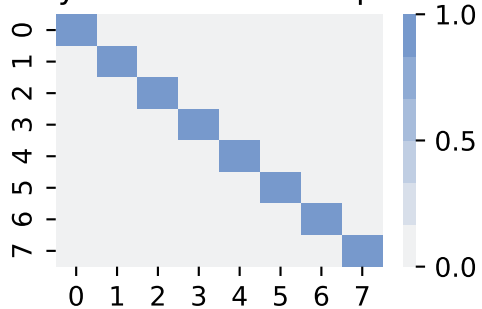

Supplement: supplementary_material [file attachment]
